# Supplementary material
Source: Springer Nature journal article supplement (https://www.springermedizin.de/resource/supplementary/12889_2012_4171_MOESM2_ESM.pdf/9491442)
Supplement: MOESM2 [file 9491442]

Table 2: Thematic groups emerging from content analysis

| <b>Thematic Group</b>                                   |
|---------------------------------------------------------|
| 1. Health, the environment and systems                  |
| 2. The role of governance                               |
| 3. Making connections, forming bridges and closing gaps |
| 4. Challenging next steps                               |
